# Supplementary material for: Identification of genes preferentially expressed in wheat egg cells and zygotes
Source: Springer Nature journal article supplement (doi:10.1007/s00299-012-1367-0), 2012-11-15
Supplement: MOESM3 [file 299_2012_1367_MOESM3_ESM.xls]

## Sheet: ZIG-ANNOTATED
Label	Result	Functional category	Homologous seq.	Annotation of homologous seq.
ZIG1	similar to known		CA656194,CA648471,CA652121
ZIG10	similar to known		CD933741,CD932567,TC246694,TC247959,TC248349	A.t. hypothetical
ZIG100	similar to known		CN011046,CV775341,CV775360,TC246694,TC247959	hypothetical
ZIG101	similar to known	Transciption RNA processing	CA681225,TC235197,TC235198
ZIG102	no similarity
ZIG103	similar to known		CA647699,TC276713	protamine
ZIG104	similar to known		TC247022	annexin
ZIG105	similar to known	Translation	TC264092
ZIG106	similar to known	Translation	TC232776,TC232183,TC232220	ubiquitin CEP52
ZIG107	similar to known		TC264614,TC232775,TC232151,TC233107,TC264615	heat shock 90
ZIG108	similar to known	Protein modification and degradation	TC234515
ZIG109	similar to known		BI751961,TC254912	weak mus ser/thr associated protein
ZIG11	similar to known	Transport		protein transport SEC61
ZIG110	similar to known		CD930140,CD933741,CD932567,CD927424,CD929799
ZIG111	similar to known		BJ218223
ZIG112	similar to known		CD930140,CD933741,CD932567,CD927424,CD929799
ZIG113	similar to known	Protein modification and degradation	TC232440,TC233154,TC265743	Proteosome subunit alpha type
ZIG114	similar to known	Translation	TC248626,TC248906,TC247657,TC246744	40S
ZIG115	similar to known	Signal transduction	TC254184,TC254185	Eastrogen receptor
ZIG116	similar to known		TC248115	Glycine rich cell wall
ZIG117	no similarity
ZIG118	no similarity
ZIG12	similar to known	Protein folding	TC264614,TC232775,TC232151,TC233107,TC264615	Heat shock
ZIG120	similar to known		TC276047
ZIG121	similar to known	Translation	TC266167,TC266168	L10 Wilms tumor related
ZIG122	similar to known		CD930140,CD927424,CD933741,CD932567,CD929799
ZIG123	similar to known	Metabolism	TC248419,TC248637,CK152931,CK152956	triose-P-isomerase
ZIG124	similar to known	Metabolism	TC255063,TC255062	trehaloz 6P phosphatase
ZIG125	similar to known		TC240743
ZIG126	similar to known	Metabolism		trioz P izomerase
ZIG127	similar to known	Metabolism		glyoxalase
ZIG128	similar to known		BQ169896,TC269296
ZIG129	similar to known	Translation	CK155827,CK159649,ZIG129-t,TC264564,CK158405,TC264572	60S
ZIG13	similar to known		CD927424,CD933741,CD932567,CD929799,CD930140
ZIG130	similar to known		CA727746,BJ273808
ZIG131	similar to known	Transport	TC235211,TC235210	Mitokondrium import inner translocase subunit tim9
ZIG132	similar to known	Metabolism	CK159984,TC246724,TC246723,TC247928,TC246709	GAD3P dehidrogenase
ZIG133	similar to known	Translation	TC233613,TC233335,TC233120	60S
ZIG134	similar to known		TC247357	membrane protein like
ZIG135	similar to known		TC252143,TC252138	ECA1
ZIG136	similar to known	Signal transduction	TC265292	homologue to GB|AAQ56424.1|34015231|AY360389 TGF-beta receptor-interacting protein-like protein {Oryza sativa (japonica cultivar-group);} , partial (41%)
ZIG137	similar to known		TC261892	weakly similar to UP|O23791 (O23791) Bromelain precursor , partial (10%)
ZIG138	similar to known	Metabolism	TC234897,TC234896,TC234895,TC234894	similar to UP|ESTD_HUMAN (P10768) Esterase D , partial (44%)
ZIG139	similar to known	Metabolism	TC247706,TC248779,CA698525,TC248750,TC246707	similar to UP|VAG1_TOBAC (O82702) Vacuolar ATP synthase subunit G 1 (V-ATPase G subunit 1) (Vacuolar proton pump G subunit 1) , complete
ZIG14	similar to known		ZIG14-te,TC236482	weakly similar to UP|Q9SFV2 (Q9SFV2) T1B9.11 protein, partial (35%)
ZIG140	similar to known	Transport	TC232409,BJ240817,TC232962,CA690365
ZIG141	no similarity	Metabolism		weakly similar to UP|Q8S994 (Q8S994) Glucosyltransferase like protein (Fragment), partial (10%)
ZIG142	similar to known	Metabolism	BQ162651,TC260334,TC269398	similar to UP|Q9NYU2 (Q9NYU2) UDP-glucose:glycoprotein glucosyltransferase 1 precursor, partial (20%)
ZIG143	similar to known	Protein modification and degradation	TC267310,TC267309,TC267308	similar to UP|Q84ZC7 (Q84ZC7) Proteasome inhibitor-like protein, partial (71%)
ZIG144	similar to known	DNS Chromatin structure	CA665923,TC232418,TC232363,TC232381	UP|Q6RUR1 (Q6RUR1) Histone H3-like protein, complete
ZIG145	similar to known	Protein folding	TC232775,TC232152,TC232151,TC233107,TC264615	UP|Q6RUR1 (Q6RUR1) Histone H3-like protein, complete
ZIG146	similar to known	DNS Chromatin structure	CA665923,TC232418,ZIG146-t,TC232363,TC232381		cap_TC232936 UP|Q6RUR1 +	877	877	UP|Q6RUR1 (Q6RUR1) Histone H3-like protein, complete
ZIG148	similar to known	Protein folding	TC233107,TC232151,TC264614,TC232152,TC232775	UP|Q7XJ80 (Q7XJ80) Cytosolic heat shock protein 90, partial (37%)
ZIG15	no similarity
ZIG151	similar to known	Translation		homologue to UP|Q6RI22 (Q6RI22) 60S ribosomal protein L44, complete
ZIG152	similar to known		CA655680,TC266743,TC266742,TC266740,TC266741	similar to UP|Q9FK53 (Q9FK53) Similarity to GAR1 protein, partial (52%)
ZIG154	no similarity
ZIG150	similar to known	Transciption RNA processing	TC249462,TC249348,TC249387	similar to UP|Q7XJ91 (Q7XJ91) Poly(A) polymerase, partial (66%)
ZIG156	similar to known	Translation	TC264730,TC264731,TC264116	homologue to UP|RL34_PEA (P40590) 60S ribosomal protein L34, partial (96%)
ZIG157	no similarity			weakly similar to GP|2623599|gb|A mucin-like protein {Trypanosoma cruzi}, partial (22%)
ZIG158	similar to known		CA601879,TC267213,TC267214,CV769560	weakly similar to GB|AAM66039.1|21594744|AY088504 copia-like retroelement pol polyprotein {Arabidopsis thaliana;} , partial (97%)
ZIG159	similar to known		TC233842,TC232145,TC233717	similar to UP|Q40705 (Q40705) Osr40c1 protein, partial (53%)
ZIG16	similar to known	Protein folding	TC264614,TC232775,TC232151,TC233107,TC264615	UP|Q7XJ80 (Q7XJ80) Cytosolic heat shock protein 90, complete
ZIG160	similar to known		TC241386	similar to UP|Q8IP68 (Q8IP68) CG31813-PA, partial (8%)
ZIG161	similar to known		CA629079,TC250994,TC250993	similar to UP|CUP9_DROME (P27781) Pupal cuticle protein Edg-91 precursor (Ecdysone-dependent protein 91), partial (10%)
ZIG162	similar to known		CV973629
ZIG163	similar to known	Translation	CA726395,CV761628,TC249660	UP|Q9AV77 (Q9AV77) 60S ribosomal protein L17, complete
ZIG164	similar to known
ZIG165	similar to known	Metabolism	TC249697,TC249694,CK203310,TC249505	similar to UP|Q5ZF96 (Q5ZF96) Mitochondrial F0 ATP synthase delta chain, partial (57%)
ZIG169	similar to known		TC235059,CA688457,TC235060,TC235058	homologue to UP|Q7X9S6 (Q7X9S6) Fiber protein Fb14, partial (89%)
ZIG17	similar to known	Metabolism	BQ169827,TC268777	similar to UP|Q6YYC4 (Q6YYC4) Beta-1,3-glucanase C-like protein, partial (70%)
ZIG170	similar to known	Transciption RNA processing	TC252708,CA708035	similar to UP|KLF4_HUMAN (O43474) Kruppel-like factor 4 (Epithelial zinc-finger protein EZF) (Gut-enriched Krueppel-like factor), partial (4%)
ZIG171	similar to known	Transciption RNA processing		weakly similar to UP|Q6Z5R8 (Q6Z5R8) Ribosomal RNA apurinic site specific lyase-like, partial (22%)
ZIG172	similar to known		CA597812,TC252385,TC252386	similar to GP|29367415|gb| ADP ribosylation GTPase-like protein {Oryza sativa (japonica cultivar-group)}, partial (10%)
ZIG173	similar to known	Metabolism	CK159984,TC246724,TC246723,TC247928,TC246709	homologue to UP|G3PC_HORVU (P08477) Glyceraldehyde-3-phosphate dehydrogenase, cytosolic (Fragment) , partial (86%)
ZIG174	similar to known	Cytoskeleton		weakly similar to UP|Q8H9C2 (Q8H9C2) Ankyrin-like protein, partial (24%)
ZIG175	similar to known		TC266075,TC266076,TC266073,TC266074
ZIG176	similar to known		TC249691,TC249661	weakly similar to UP|Q9SBM1 (Q9SBM1) Hydroxyproline-rich glycoprotein DZ-HRGP precursor, partial (14%)
ZIG177	similar to known		CA658673,TC264215,TC264205,TC264228	similar to UP|Q9M011 (Q9M011) Light-inducible protein ATLS1, partial (90%)
ZIG178	similar to known	Metabolism	TC264631,TC264632	similar to UP|Q948T6 (Q948T6) Glyoxalase I, partial (85%)
ZIG179	similar to known		TC250863,TC250862,CK211887,TC250864,TC250865	similar to GB|AAM96981.1|22530954|AY136315 expressed protein {Arabidopsis thaliana;} , partial (18%)
ZIG18	similar to known	Translation	CA603999,TC232131,CA675382,TC232130	homologue to GP|14585879|gb| ribosomal protein L15 {Homo sapiens}, partial (40%)
ZIG181	similar to known		TC275553	homologue to GB|AAM10793.1|22651570|AY090788 DNA repair/transcription factor protein {Arabidopsis thaliana;} , partial (14%)
ZIG182	similar to known	Translation	TC264208,TC264223	homologue to PIR|T48952|T48952 ribosomal S29-like protein - Arabidopsis thaliana {Arabidopsis thaliana;} , complete
ZIG183	similar to known		TC235057,TC235056,CK215374	similar to GB|AAL05900.1|15777879|AY055100 AT3g15640/MSJ11_4 {Arabidopsis thaliana;} , partial (62%)
ZIG184	similar to known
ZIG185	similar to known			-
ZIG186	similar to known		TC241865	-
ZIG187	similar to known	Metabolism	TC238916	homologue to UP|Q94IN1 (Q94IN1) P-type ATPase (Fragment), partial (32%)
ZIG188	similar to known	Translation	TC264452,TC264446,TC264449,TC264448,TC264447	similar to UP|RS8_PRUAR (O81361) 40S ribosomal protein S8, partial (60%)
ZIG189	similar to known		CA640929,TC255307	weakly similar to UP|V713_ARATH (Q9LFP1) Vesicle-associated membrane protein 713 (AtVAMP713), complete
ZIG19	similar to known		ZIG19-te,TC252033	weakly similar to UP|Q93V55 (Q93V55) Male sterility 1 protein, partial (10%)
ZIG190	similar to known		TC234698,TC234703	similar to UP|Q6K7T9 (Q6K7T9) Peroxisomal fatty acid beta-oxidation multifunctional protein, partial (29%)
ZIG191	similar to known		CK195101,TC255435
ZIG192	similar to known	Cytoskeleton	TC264064,CK198752	homologue to UP|Q84JJ5 (Q84JJ5) Actin, partial (81%)
ZIG198	similar to known			-
ZIG199	similar to known	Protein folding	TC232775,TC264614,TC232151,TC233107,TC264615	UP|Q7XJ80 (Q7XJ80) Cytosolic heat shock protein 90, complete
ZIG2	similar to known			-
ZIG20	similar to known	Metabolism	TC233945,CA650908,TC232702	homologue to UP|ENO_ORYSA (Q42971) Enolase (2-phosphoglycerate dehydratase) (2-phospho-D-glycerate hydro-lyase) (OSE1) , partial (6%)
ZIG200	similar to known	Translation	BQ235913,TC264091,TC264114,TC264108	similar to PIR|S32578|S325 ribosomal protein L17.1 cytosolic - barley, partial (43%)
ZIG201	similar to known		TC268770,TC268769	similar to UP|Q9M7I5 (Q9M7I5) Arabinogalactan protein (Fragment), partial (5%)
ZIG202	similar to known	Transciption RNA processing	TC251761,TC251760,TC251759	similar to GB|AAM67289.1|21618239|AY084743 DNA directed RNA polymerase II polypeptide K {Arabidopsis thaliana;} , partial (92%)
ZIG203	similar to known		BQ244215,TC266969,TC266970
ZIG204	similar to known		TC240741	-
ZIG205	similar to known	Translation	TC233511	gb|AF168852.1|AF168852 Hordeum jubatum 18S small subunit ribosomal RNA gene, complete sequence, partial (20%)
ZIG206	similar to known		TC267632,TC267631,TC267633,TC267792	similar to UP|Q6F3B3 (Q6F3B3) Expressed protein, partial (47%)
ZIG208	similar to known	Defense and stress	BJ297692,TC262760,TC263204	similar to UP|PR4_PHAVU (Q09020) Wound-induced basic protein, complete
ZIG209	similar to known		CA502559	similar to GP|13872880|dbj P0434B04.8 {Oryza sativa (japonica cultivar-group)}, partial (4%)
ZIG210	no similarity
ZIG211	similar to known	Metabolism	CK200714,TC264282,TC264281,TC264280,TC264283	homologue to UP|Q41628 (Q41628) ATP/ADP carrier protein, partial (61%)
ZIG212	similar to known		CD929799,CD930140,CD933741,CD932567,CD927424
ZIG213	similar to known		TC266757	homologue to UP|Q6TUF4 (Q6TUF4) LRRGT00090, partial (13%)
ZIG214	similar to known	Translation	CK152910,CK215743,TC249399,TC249434,TC264502	homologue to UP|EF1A_WHEAT (Q03033) Elongation factor 1-alpha (EF-1-alpha), partial (66%)
ZIG215	similar to known	DNS Chromatin structure		homologue to SP|P40631|MLH_T Micronuclear linker histone polyprotein (MIC LH), partial (1%)
ZIG216	similar to known	Transport	BJ240817,CA690365,TC232409,TC232962	ZIG216	sim to known	transport	BJ240817,CA690365,TC232409,TC232962	similar to UP|Q9M206 (Q9M206) Transport protein subunit-like, partial (90%)
ZIG217	similar to known			-
ZIG219	similar to known	Metabolism	CK152635,TC264322,TC264316	similar to SP|P26517|G3PX Glyceraldehyde 3-phosphate dehydrogenase cytosolic (EC 1.2.1.12). [Barley] {Hordeum vulgare}, partial (37%)
ZIG22	similar to known	Translation	TC249161,TC249008,TC249260,TC249007	similar to UP|R22B_ARATH (Q9M9W1) 60S ribosomal protein L22-2, partial (96%)
ZIG220	similar to known	Metabolism	CA730292,TC267941	similar to UP|Q69SU0 (Q69SU0) Inositol 5-phosphatase 3-like protein, partial (17%)
ZIG221	similar to known			-
ZIG225	similar to known	Signal transduction	TC252504,CA654057	weakly similar to GP|14388971|gb| COP9 signalosome subunit 3 {Arabidopsis thaliana}, partial (11%)
ZIG227	similar to known	Transciption RNA processing	TC251657,TC251656,CD862873	similar to UP|Q9SJM6 (Q9SJM6) Expressed protein (Zinc finger-like protein), partial (57%)
ZIG229	similar to known	Metabolism	CA663405,CA655914,CK159984,TC248423,TC246709	similar to UP|Q7XJJ1 (Q7XJJ1) Cytosolic glyceraldehyde-3-phosphate dehydrogenase (Fragment), partial (51%)
ZIG23	similar to known		BJ272968,CA643144	-
ZIG230	similar to known		CN011046,CD889724,TC246788,CD930140,CD893272	similar to GB|AAN28739.1|23505759|AY143800 At2g23090/F21P24.15 {Arabidopsis thaliana;} , partial (96%)
ZIG235	similar to known			-
ZIG237	similar to known	Metabolism	TC263244	similar to UP|UCRI_MAIZE (P49727) Ubiquinol-cytochrome c reductase iron-sulfur subunit, mitochondrial precursor (Rieske iron-sulfur protein) (RISP) , partial (88%)
ZIG238	similar to known	Translation	TC247688,TC247209,TC246985,CK212212	UP|Q7X9K4 (Q7X9K4) S28 ribosomal protein (Fragment), partial (77%)
ZIG24	similar to known	Transciption RNA processing	TC263992	similar to UP|Q6ZB01 (Q6ZB01) Splicing coactivator subunit-like protein, partial (14%)
ZIG240	similar to known			-
ZIG242	similar to known	Transport	TC264258,TC264246	similar to UP|Q40918 (Q40918) 2-oxoglutarate/malate translocator, complete
ZIG244	similar to known			-
ZIG250	similar to known			-
ZIG251	similar to known		CD899824	-
ZIG252	similar to known	Translation	CA694365,CA610579,TC232125,TC233123	similar to GP|13489167|gb| 60S ribosomal protein L21 {Oryza sativa (japonica cultivar-group)}, partial (29%)
ZIG253	similar to known	Transciption RNA processing	CD937166	homologue to GP|5763821|emb| E2F protein {Triticum sp.}, partial (17%)
ZIG254	similar to known			similar to UP|Q640T0 (Q640T0) Ttpa-prov protein, partial (10%)
ZIG255	similar to known	Transciption RNA processing	BQ905459,TC242679	similar to UP|Q69V36 (Q69V36) Transcriptional factor B3-like, partial (42%)
ZIG256	no similarity			-
ZIG257	similar to known	Metabolism	TC264281,TC264280,TC264283,TC264287,TC264282	homologue to UP|Q41628 (Q41628) ATP/ADP carrier protein, partial (67%)
ZIG258	similar to known			-
ZIG259	similar to known		CV973430	homologue to UP|Q6H800 (Q6H800) Proteasome subunit beta type 3, complete
ZIG26	similar to known	Translation	CA610579,CA694365,TC232125,TC233123,CK160810	similar to GP|13489167|gb| 60S ribosomal protein L21 {Oryza sativa (japonica cultivar-group)}, partial (29%)
ZIG261	similar to known	Metabolism	CA629766,TC264258,TC264246	GP|10798640|em mitochondrial 2-oxoglutarate/malate carrier protein {Nicotiana tabacum}, partial (4%)
ZIG262	similar to known	Translation	CA694365,CA610579,TC232125,TC233123	homologue to UP|Q7XYC9 (Q7XYC9) 60s ribosomal protein L21 (Fragment), complete
ZIG263	similar to known	Metabolism	CA629766,TC264258,TC264246	similar to UP|Q40918 (Q40918) 2-oxoglutarate/malate translocator, complete
ZIG265	no similarity			-
ZIG266	similar to known		TC265001,TC265000,TC269878	-
ZIG267	similar to known		CD933741,CD932567,TC246694,TC247959,TC248349	similar to GB|AAN28739.1|23505759|AY143800 At2g23090/F21P24.15 {Arabidopsis thaliana;} , partial (69%)
ZIG268	similar to known	Metabolism	TC264632,TC264631,TC264636	homologue to UP|Q948T6 (Q948T6) Glyoxalase I, partial (29%)
ZIG269	similar to known	Protein modification and degradation	CA666552,TC249507,CK206260	similar to UP|Q9AXQ2 (Q9AXQ2) Mitochondrial processing peptidase beta subunit, partial (88%)
ZIG27	similar to known		TC265408,TC265409,CA668006,TC265406	similar to GB|AAB49704.1|1890130|ATU89986 valyl tRNA synthetase {Arabidopsis thaliana;} , partial (5%)
ZIG270	similar to known	Signal transduction	TC268387	similar to UP|WASP_MOUSE (P70315) Wiskott-Aldrich syndrome protein homolog (WASp), partial (3%)
ZIG271	similar to known		CD933741,CD932567,TC246694,TC247959,TC248349	similar to GB|AAN28739.1|23505759|AY143800 At2g23090/F21P24.15 {Arabidopsis thaliana;} , partial (96%)
ZIG272	similar to known	Signal transduction	BQ168282	weakly similar to GP|10567246|dbj gonadotropin receptor II {Oreochromis niloticus}, partial (5%)
ZIG273	similar to known		CD919297,TC239662	similar to UP|Q6F2V0 (Q6F2V0) Expressed protein, partial (27%)
ZIG274	similar to known			-
ZIG275	similar to known	Metabolism	TC235178,TC246657	similar to UP|Q840B9 (Q840B9) Endo-b1,4-mannanase 26B, partial (4%)
ZIG276	similar to known	Translation	TC249286,TC249488,TC249285	UP|EF1A_WHEAT (Q03033) Elongation factor 1-alpha (EF-1-alpha), partial (60%)
ZIG277	similar to known	Protein folding	TC264614,TC232775,TC232151,TC233107,TC264615	homologue to UP|Q7XJ80 (Q7XJ80) Cytosolic heat shock protein 90, partial (32%)
ZIG278	similar to known		TC249037,TC249038	similar to UP|O70495 (O70495) Plenty-of-prolines-101, partial (3%)
ZIG279	similar to known	Metabolism	BQ244094,TC247227,TC248071	homologue to UP|Q7Y248 (Q7Y248) Cytosolic 6-phosphogluconate dehydrogenase , partial (25%)
ZIG28	no similarity			-
ZIG280	similar to known		TC235666,TC235665	homologue to UP|Q94BT9 (Q94BT9) At1g66240/T6J19_6, partial (69%)
ZIG282	similar to known	Cell cycle	TC240770,TC240771	similar to UP|Q6K9R7 (Q6K9R7) DNA ligase-like, partial (53%)
ZIG284	no similarity			-
ZIG285	similar to known			-
ZIG286	similar to known	Transciption RNA processing	TC269462,TC269461	weakly similar to UP|RSP3_CAEEL (Q9NEW6) Probable splicing factor, arginine/serine-rich 3 (CeSF2) (CeSF2/ASF), partial (9%)
ZIG287	similar to known		TC247468,BQ236693,TC247123	similar to UP|Q5ZC88 (Q5ZC88) CUL1, complete
ZIG288	similar to known	Signal transduction	TC256414,TC256413	weakly similar to PIR|T06583|T06583 protein kinase MEK1 - tomato {Lycopersicon esculentum;} , partial (26%)
ZIG289	similar to known		TC241899
ZIG29	similar to known	Signal transduction	CA737317,TC266098,BQ620113	similar to UP|Q761Z3 (Q761Z3) BRI1-KD interacting protein 121 (Fragment), partial (88%)
ZIG290	similar to known	Metabolism	TC264632,TC264631,TC264636	homologue to UP|Q948T6 (Q948T6) Glyoxalase I, partial (29%)
ZIG291	similar to known		CA611097	-
ZIG292	similar to known	DNS Chromatin structure		GP|3273350|db histone H3 {Nicotiana tabacum}, complete
ZIG293	similar to known	DNS Chromatin structure	TC269979	similar to UP|Q94F79 (Q94F79) Nucleosome/chromatin assembly factor A, partial (87%)
ZIG294	similar to known	Metabolism	TC233506,CK194401,CA659561,BQ236592,TC233141	homologue to SP|P50299|METK_ S-adenosylmethionine synthetase 1 (EC 2.5.1.6) (Methionine adenosyltransferase 1), partial (12%)
ZIG295	no similarity			-
ZIG296	no similarity
ZIG297	no similarity
ZIG299	similar to known		CA658673,TC264215,TC264205,TC264228	similar to UP|Q9M011 (Q9M011) Light-inducible protein ATLS1, partial (90%)
ZIG3	no similarity
ZIG30	similar to known		TC247507
ZIG300	similar to known	Translation	TC266869,TC266866	homologue to UP|Q9M5M1 (Q9M5M1) 40S ribosomal protein S11, partial (97%)
ZIG301	no similarity
ZIG302	similar to known	Translation		homologue to SP|Q03033|EF1A_ Elongation factor 1-alpha (EF-1-alpha). [Wheat] {Triticum aestivum}, partial (9%)
ZIG303	similar to known	Transciption RNA processing	TC266847,TC266845,TC266846	similar to UP|Q9NP08 (Q9NP08) H6 homeodomain protein, partial (6%)
ZIG304	similar to known		TC256344
ZIG305	similar to known		TC250356	similar to UP|Q94II3 (Q94II3) ERD3 protein, partial (14%)
ZIG306	similar to known		TC236243,TC236242	similar to UP|Q94II1 (Q94II1) ERD7 protein (Fragment), partial (35%)
ZIG307	similar to known	Translation	TC250351,TC250350,TC250349,TC250348,TC250353	homologue to UP|Q7X729 (Q7X729) Acidic ribosomal protein P2 (Acidic ribosomal protein P2a-2) (Fragment), partial (29%)
ZIG308	no similarity
ZIG309	similar to known	Protein modification and degradation	TC267310,TC267309,TC267308	similar to UP|Q84ZC7 (Q84ZC7) Proteasome inhibitor-like protein, partial (75%)
ZIG31	similar to known	Metabolism	TC249697,TC249694,CK203310,TC249651,TC249505	similar to UP|Q5ZF96 (Q5ZF96) Mitochondrial F0 ATP synthase delta chain, partial (57%)
ZIG310	no similarity
ZIG311	similar to known	Translation	TC264452,TC264446,TC264449,TC264448,TC264447	similar to UP|RS8_PRUAR (O81361) 40S ribosomal protein S8, partial (60%)
ZIG312	similar to known	Metabolism		similar to GP|7579064|gb|A cytosolic glyceraldehyde-3-phosphate dehydrogenase GAPDH {Triticum aestivum}, partial (19%)
ZIG313	similar to known	Transciption RNA processing	TC251760,CA634786,TC251759,TC251761	similar to GB|AAM67289.1|21618239|AY084743 DNA directed RNA polymerase II polypeptide K {Arabidopsis thaliana;} , partial (92%)
ZIG315	similar to known	Translation	TC264730,TC264731,TC264116	homologue to UP|RL34_PEA (P40590) 60S ribosomal protein L34, partial (96%)
ZIG316	similar to known		TC244117	weakly similar to UP|Q5ZB73 (Q5ZB73) Epstein-Barr virus EBNA-1-like protein, partial (15%)
ZIG317	similar to known		TC235300,TC235299,TC235301,TC235302,CD491603	similar to UP|O80800 (O80800) T8F5.6 protein, partial (75%)
ZIG318	similar to known		TC236296,TC236298	similar to UP|GAS1_MOUSE (Q01721) Growth-arrest-specific protein 1 precursor (GAS-1), partial (5%)
ZIG319	similar to known	Protein modification and degradation	CA711213,TC263967,CA681016,TC263789,TC263682	homologue to UP|O48555 (O48555) Ubiquitin conjugating enzyme, partial (61%)
ZIG32	similar to known	Protein folding	TC232775,TC232152,TC264614,TC233107,TC232151	UP|Q7XJ80 (Q7XJ80) Cytosolic heat shock protein 90, partial (15%)
ZIG320	similar to known			homologue to UP|Q5XUV2 (Q5XUV2) Leucine-rich repeat protein, partial (30%)
ZIG321	similar to known	Metabolism	TC248719,TC247514	similar to UP|Q9FLV0 (Q9FLV0) Flavanone 3-hydroxylase-like protein, partial (18%)
ZIG322	similar to known		TC246694,CD933741,CD932567,TC247959,TC248349,TC246694	similar to GB|AAN28739.1|23505759|AY143800 At2g23090/F21P24.15 {Arabidopsis thaliana;} , partial (96%)
ZIG323	similar to known		CK205666,CK213886	weakly similar to PIR|H86265|H862 protein F3F19.18 [imported] - Arabidopsis thaliana, partial (7%)
ZIG324	similar to known	Transciption RNA processing	TC263603,TC263602,TC263630	similar to UP|Q84JE9 (Q84JE9) Dehydration-responsive AP2 domain transcriptional activator (AP2 transcriptional activator DRF1.3), partial (35%)
ZIG325	similar to known		CD933741,CD932567,TC246694,TC247959,TC248349	similar to GB|AAN28739.1|23505759|AY143800 At2g23090/F21P24.15 {Arabidopsis thaliana;} , partial (96%)
ZIG326	similar to known		CD927424,CD933741,CD932567,CD929799,CD930140
ZIG327	no similarity
ZIG328	no similarity
ZIG329	similar to known	Metabolism	TC249697,TC249694,CK203310,TC249505	similar to UP|Q5ZF96 (Q5ZF96) Mitochondrial F0 ATP synthase delta chain, partial (57%)
ZIG33	similar to known		CD929799,CD933741,CD932567,CD927424,CD930140
ZIG330	no similarity
ZIG331	similar to known	Metabolism	CA663405,CA655914,CK159984,TC248423,TC246709	similar to GP|7579064|gb|A cytosolic glyceraldehyde-3-phosphate dehydrogenase GAPDH {Triticum aestivum}, partial (19%)
ZIG332	similar to known	Protein folding	TC264614,TC232775,TC232151,TC233107,TC264615	homologue to UP|Q7XJ80 (Q7XJ80) Cytosolic heat shock protein 90, partial (32%)
ZIG333	similar to known		TC236915,TC236916	similar to GB|AAS76734.1|45773860|BT012247 At1g32260 {Arabidopsis thaliana;} , partial (44%)
ZIG334	similar to known	Translation	TC247688,TC247209,TC246985,CK212212	homologue to UP|Q7X9K4 (Q7X9K4) S28 ribosomal protein (Fragment), partial (98%)
ZIG335	similar to known	Metabolism	TC264783	similar to UP|Q7FSL4 (Q7FSL4) Malate dehydrogenase, partial (96%)
ZIG338	similar to known		TC258511,TC242079	similar to PIR|E86286|E86286 F9L1.18 protein - Arabidopsis thaliana {Arabidopsis thaliana;} , partial (23%)
ZIG339	similar to known		TC234616
ZIG34	no similarity
ZIG340	no similarity
ZIG341	similar to known		TC270903
ZIG342	similar to known	Metabolism	TC264632,TC264631,TC264636	homologue to UP|Q948T6 (Q948T6) Glyoxalase I, partial (29%)
ZIG343	similar to known		TC252202,TC252203,CA698113	similar to UP|Q05686 (Q05686) F-131 protein, partial (11%)
ZIG344	similar to known	Metabolism	TC264632,TC264631,TC264636	homologue to UP|Q9ZWJ2 (Q9ZWJ2) Glyoxalase I, complete
ZIG345	similar to known		TC250994,TC250993,CA629079	similar to UP|CUP9_DROME (P27781) Pupal cuticle protein Edg-91 precursor (Ecdysone-dependent protein 91), partial (10%)
ZIG346	similar to known	Metabolism	TC264632,TC264631,TC264636	homologue to UP|Q948T6 (Q948T6) Glyoxalase I, partial (29%)
ZIG347	similar to known		CD929799,CD933741,CD932567,CD927424,CD930140
ZIG348	similar to known		CV973401,CA704687
ZIG349	no similarity
ZIG35	similar to known		TC270569	similar to UP|Q8RYM1 (Q8RYM1) MRNA-associated protein mrnp41-like, complete
ZIG350	similar to known	Transciption RNA processing	TC251657,TC251656,CD862873	similar to UP|Q9SJM6 (Q9SJM6) Expressed protein (Zinc finger-like protein), partial (57%)
ZIG351	similar to known	Signal transduction	TC246808	homologue to UP|O82783 (O82783) Importin alpha 2 subunit (NLS receptor), partial (98%)
ZIG352	similar to known	Transciption RNA processing	CA604901,TC249032,TC249177
ZIG353	similar to known	Defense and stress	CK155313,CK155302,TC234786,TC234790,TC234787	similar to UP|WSC4_YEAST (P38739) Cell wall integrity and stress response component 4 precursor, partial (4%)
ZIG354	similar to known	Metabolism	CA652075,TC251726,TC251727	GP|28057802|gb dihydrolipoamide dehydrogenase {Xylella fastidiosa Temecula1}, partial (2%)
ZIG355	similar to known	Metabolism	TC246695,TC247928,TC246723,TC246709,TC246724	homologue to UP|G3PC_HORVU (P08477) Glyceraldehyde-3-phosphate dehydrogenase, cytosolic (Fragment) , partial (83%)
ZIG357	similar to known	Signal transduction	CK154639,TC249241	homologue to UP|RIC1_ORYSA (P40392) Ras-related protein RIC1, complete
ZIG359	similar to known	Translation	CK200895,TC262748	similar to GP|14719290|gb| ribosomal protein L35A {Zea mays}, partial (41%)
ZIG36	similar to known	Translation	BQ235913,TC264091,TC264114,TC264108
ZIG360	similar to known	Metabolism	TC264632,TC264631,TC264636	similar to UP|Q948T6 (Q948T6) Glyoxalase I, partial (85%)
ZIG361	similar to known		BJ246109,TC263874,TC263577,TC248105,TC247375	similar to UP|Q9SDG8 (Q9SDG8) ESTs AU068544(C30430), partial (97%)
ZIG362	similar to known	Transporter	AJ602508,TC237723,BQ170284,CA666349
ZIG363	similar to known		CA652599,CD933232,CK200337,TC241198	similar to GP|17945270|gb| RE14437p {Drosophila melanogaster}, partial (3%)
ZIG364	similar to known	Translation	TC264092	homologue to UP|Q6RJY1 (Q6RJY1) 60S ribosomal protein L12, complete
ZIG365	no similarity
ZIG366	similar to known		TC265246,TC265245	weakly similar to UP|AGA1_YEAST (P32323) A-agglutinin attachment subunit precursor, partial (6%)
ZIG367	similar to known	Metabolism	CA663405,CA655914,CK159984,TC248423,TC246709	similar to GP|7579064|gb|A cytosolic glyceraldehyde-3-phosphate dehydrogenase GAPDH {Triticum aestivum}, partial (19%)
ZIG368	similar to known		CA611097
ZIG37	no similarity
ZIG371	similar to known	Translation	CK200895,TC262748,TC262724	homologue to UP|Q9ATW9 (Q9ATW9) Ribosomal protein L35A, complete
ZIG372	similar to known	Translation	TC233048,TC264555,TC233144,TC264551,TC233370	UP|Q6V959 (Q6V959) Ribosomal protein L3, partial (35%)
ZIG373	similar to known	Defense and stress		homologue to SP|Q09020|PR4_PH Wound-induced basic protein. [Kidney bean French bean] {Phaseolus vulgaris}, partial (44%)
ZIG374	similar to known		CA669238,CD927532,TC264506,TC264509	similar to UP|Q9FZC2 (Q9FZC2) T1K7.26 protein, partial (16%)
ZIG375	similar to known		CA734700,TC232674,CA703032,TC232588,CA646865	homologue to UP|Q60EC0 (Q60EC0) Unknown protein, partial (14%)
ZIG376	no similarity
ZIG377	similar to known	Translation	CA640594,TC264116,CK216964	similar to SP|P40590|RL34 60S ribosomal protein L34. [Garden pea] {Pisum sativum}, partial (94%)
ZIG379	similar to known		CD930140,CD932567,CV775341,CV775360,CN011046
ZIG38	similar to known	DNS Chromatin structure	CK216457,CA687638,TC233133,TC233134,TC233122	UP|Q6RUR1 (Q6RUR1) Histone H3-like protein, complete
ZIG380	similar to known	Protein modification and degradation	TC247799,TC234952,TC248330,TC234951,TC234950	homologue to UP|Q9FS06 (Q9FS06) Cysteine proteinase inhibitor, partial (94%)
ZIG381	similar to known		TC266254,CA658838,TC266255	similar to UP|Q6ST18 (Q6ST18) Heat shock factor binding protein 2, partial (76%)
ZIG39	similar to known	Metabolism	TC266930,TC266929	weakly similar to UP|Q8GYW7 (Q8GYW7) Acyl-CoA thioesterase (At1g01710), partial (66%)
ZIG4	similar to known		TC258807,TC269305	weakly similar to UP|O13303 (O13303) SIS1 protein, partial (9%)
ZIG40	similar to known	Translation	BJ288865,CK196337,TC264255,TC264261,TC264267,
ZIG41	similar to known		CD927424,CD929799,CD930140,CD933741,CD932567,
ZIG42	similar to known		TC249691,TC249661,	weakly similar to UP|Q9SBM1 (Q9SBM1) Hydroxyproline-rich glycoprotein DZ-HRGP precursor, partial (14%)
ZIG43	similar to known
ZIG44	similar to known	DNS Chromatin structure		similar to UP|Q8LPU5 (Q8LPU5) DNA methyltransferase 105, partial (47%)
ZIG45	no similarity
ZIG47	similar to known		TC261892,	weakly similar to UP|O23791 (O23791) Bromelain precursor , partial (10%)
ZIG49	similar to known		TC253925,TC253926,	similar to UP|Q8RZU5 (Q8RZU5) MCT-1 protein-like, partial (15%)
ZIG48	no similarity
ZIG5	similar to known	Metabolism	TC248197,TC247922,	homologue to UP|ADH1_PENAM (P14219) Alcohol dehydrogenase 1 (ADH slow-allele) , partial (27%)
ZIG50	similar to known		CA699947,
ZIG51	no similarity
ZIG52	similar to known		CA690811,CA674821,TC252028,CK153263,	similar to UP|Q945P8 (Q945P8) At1g19120/F14D16_26, complete
ZIG53	no similarity
ZIG54	similar to known		CD929799,CD930140,CD933741,CD932567,CD927424,
ZIG55	no similarity
ZIG56	similar to known		BQ905711,TC235666,TC235665,	homologue to UP|Q94BT9 (Q94BT9) At1g66240/T6J19_6, partial (69%)
ZIG57	similar to known		TC257619,	similar to UP|Q65F56 (Q65F56) YvtA (PDZ/DHR/GLGF domain,Peptidase, trypsin-like serine and cysteine proteases), partial (5%)
ZIG58	similar to known	Signal transduction	TC232484,CA635616,TC234441,TC264671,TC264669,	UP|Q944C6 (Q944C6) Small Ras-related GTP-binding protein (Small Ran-related GTP-binding protein), complete
ZIG61	no similarity
ZIG62	similar to known		BJ272600,
ZIG63	similar to known	Transciption RNA processing	CD862873,TC251656,TC251657,	similar to UP|Q9SJM6 (Q9SJM6) Expressed protein (Zinc finger-like protein), partial (57%)
ZIG64	similar to known		CD933741,CD932567,TC246694,TC247959,TC248349,	similar to GB|AAN28739.1|23505759|AY143800 At2g23090/F21P24.15 {Arabidopsis thaliana;} , partial (96%)
ZIG65	similar to known		TC267632,TC267631,TC267633,	similar to UP|Q6F3B3 (Q6F3B3) Expressed protein, partial (47%)
ZIG66	no similarity
ZIG67	similar to known	Translation	CA603999,TC232131,TC232130,	UP|Q96S84 (Q96S84) Ribosomal protein L15, complete
ZIG69	similar to known		TC251152,TC251151,CK172272,	similar to UP|FK21_ARATH (Q38935) FK506-binding protein 2-1 precursor (Peptidyl-prolyl cis-trans isomerase) (PPIase) (Rotamase) (15 kDa FKBP) (FKBP-15-1) , partial (80%)
ZIG7	similar to known		TC234526,CA669176,TC234523,TC234522,TC234525,	similar to UP|Q5Z7Y5 (Q5Z7Y5) Cell wall protein-like, partial (5%)
ZIG71	similar to known		TC251152,CA615438,CA688184,TC251151,CK172272,	similar to SP|Q41649|FKB2_ FK506-binding protein 2 precursor (EC 5.2.1.8) (Peptidyl-prolyl cis- trans isomerase) (PPiase), partial (52%)
ZIG72	similar to known	Metabolism	TC236843,	homologue to UP|Q8LHF0 (Q8LHF0) NADH-dependent glutamate synthase, partial (17%)
ZIG73	similar to known	Metabolism	TC251619,TC251621,	similar to SP|P55786|PSA_HUMAN Puromycin-sensitive aminopeptidase (PSA). {Homo sapiens;} , partial (25%)
ZIG74	similar to known		AJ602508,BQ170284,CA666349,TC237723,	similar to UP|Q8H5Q5 (Q8H5Q5) Organic solute transporter-like, partial (76%)
ZIG75	no similarity
ZIG76	similar to known		TC241191,	similar to UP|YTH2_HUMAN (Q9Y5A9) YTH domain protein 2 (High-glucose-regulated protein 8) (NY-REN-2 antigen) (CLL-associated antigen KW-14), partial (5%)
ZIG77	similar to known	Defense and stress	TC263194,	similar to UP|Q84LL6 (Q84LL6) Salt tolerance protein 5, partial (57%)
ZIG78	similar to known		CA736402,TC239105,TC254165,	similar to UP|Q942M1 (Q942M1) STAM binding protein(Associated molecule with the SH3 domain of STAM)-like, partial (60%)
ZIG8	no similarity
ZIG81	similar to known	Translation	CA484288,TC233132,TC233147,	UP|Q96S84 (Q96S84) Ribosomal protein L15, complete
ZIG82	no similarity
ZIG83	similar to known	Protein modification and degradation	CA722115,CA700294,CK198942,TC247984,TC247939,	similar to UP|Q8W423 (Q8W423) 26S proteasome regulatory particle non-ATPase subunit12, complete
ZIG84	similar to known
ZIG85	similar to known	Protein modification and degradation		similar to GP|17297985|dbj 26S proteasome regulatory particle non-ATPase subunit12 {Oryza sativa (japonica cultivar-group)}, partial (21%)
ZIG86	similar to known		TC234286,TC234258,	PRF|1604470A|226763|1604470A poly-ubiquitin. {Zea mays;} , partial (56%)
ZIG88	similar to known		CD927424,CD933741,CD932567,CD929799,CD930140,
ZIG89	no similarity
ZIG9	no similarity
ZIG90	similar to known	Translation	BJ288865,CK196337,TC264255,BQ242939,TC264261,	similar to UP|Q84ZK1 (Q84ZK1) Translation initiation factor 5A, complete
ZIG91	similar to known			homologue to SP|Q40070|PSBR Photosystem II 10 kDa polypeptide chloroplast precursor. [Barley] {Hordeum vulgare}, partial (88%)
ZIG92	similar to known		CD933741,CD932567,TC246694,TC247959,TC248349,	similar to GB|AAN28739.1|23505759|AY143800 At2g23090/F21P24.15 {Arabidopsis thaliana;} , partial (96%)
ZIG93	similar to known	Defense and stress	TC263194,	similar to UP|Q84LL6 (Q84LL6) Salt tolerance protein 5, partial (57%)
ZIG94	similar to known	Protein folding	CD916691,TC264696,TC264693,	similar to UP|Q96269 (Q96269) Heat-shock protein, partial (49%)
ZIG95	similar to known		BQ905711,TC235666,TC235665,	homologue to UP|Q94BT9 (Q94BT9) At1g66240/T6J19_6, partial (69%)
ZIG96	no similarity
